# Supplementary material
Source: bioRxiv or medRxiv preprint supplement (https://www.biorxiv.org/highwire/filestream/55105/field_highwire_adjunct_files/2/119289-2.pdf)
Supplement: Supplementary file [file 119289-2.pdf]

**Table S1. Parts list of LSTM**

| Source                        | Cat. Number               | Qty | Description                                                                              |
|-------------------------------|---------------------------|-----|------------------------------------------------------------------------------------------|
| <b>Detection unit</b>         |                           |     |                                                                                          |
| Thorlabs                      | CXY2                      | 1   | 60 mm Cage System Translating Lens Mount for Ø2" Optics                                  |
| Thorlabs                      | LCP90F                    | 1   | 60 mm Removable Cage Plate                                                               |
| Thorlabs                      | SM2A20                    | 1   | SM2 - M38 ADAPTER FOR NIKON TUBE LENS                                                    |
| Thorlabs                      | SM2L30-SM2                | 2   | SM2 Lens Tube, 3" Thread Depth, One Retaining Ring Included                              |
| Thorlabs                      | LCP09                     | 2   | 60 mm Cage Plate with Ø2.2" Double Bore for SM2 Lens Tube Mounting                       |
| Thorlabs                      | ER10                      | 4   | Cage Assembly Rod, 10" Long, Ø6 mm                                                       |
| Thorlabs                      | SM1A1                     | 1   | Adapter with External SM05 Threads and Internal SM1 Threads                              |
| Thorlabs                      | SM2A31                    | 1   | Adapter with External C-Mount Threads and Internal SM2 Threads                           |
| Hamamatsu                     | C13440                    | 1   | Digital camera                                                                           |
| Custom                        | ObjAdater                 | 1   | Custom made Adapter from SM2 to M34 threading                                            |
| Thorlabs                      | SM2V10                    | 1   | Ø2" Adjustable Lens Tube, 0.81" Travel                                                   |
| Olympus                       | XIPlan N, 10X             | 2   | Oil immersion Objective                                                                  |
| Thorlabs                      | LCP01B                    | 2   | 60 mm Cage Mounting Bracket                                                              |
| Thorlabs                      | RS2                       | 2   | Ø1" Pillar Post, 1/4"-20 Taps, L = 2", 8-32 Adapter Included                             |
| Thorlabs                      | TBB0606                   | 2   | Large-Area Translation Stage, 6" x 7.66"                                                 |
| <b>Two Illumination units</b> |                           |     |                                                                                          |
| Thorlabs                      | SM2V10                    | 2   | Ø2" Adjustable Lens Tube, 0.81" Travel                                                   |
| Custom                        | ObjAdater                 | 2   | Custom made Adapter from SM2 to M34 threading                                            |
| Olympus                       | Macro<br>4x/0.28NA/29.5WD | 2   | Air Objective                                                                            |
| Thorlabs                      | SM2A20                    | 2   | SM2 - M38 ADAPTER FOR NIKON TUBE LENS                                                    |
| Thorlabs                      | CXY2                      | 2   | 60 mm Cage System Translating Lens Mount for Ø2" Optics                                  |
| Thorlabs                      | LCP09                     | 2   | 60 mm Cage Plate with Ø2.2" Double Bore for SM2 Lens Tube Mounting                       |
| Thorlabs                      | LCP01B                    | 4   | 60 mm Cage Mounting Bracket                                                              |
| Thorlabs                      | RS2                       | 4   | Ø1" Pillar Post, 1/4"-20 Taps, L = 2", 8-32 Adapter Included                             |
| Thorlabs                      | TBB0606                   | 4   | Large-Area Translation Stage, 6" x 7.66"                                                 |
| Thorlabs                      | ER05                      | 8   | Cage Assembly Rod, 1/2" Long, Ø6 mm                                                      |
| Thorlabs                      | LCP02                     | 6   | 30 mm to 60 mm Cage Plate Adapter, 8-32 Tap                                              |
| Thorlabs                      | LJ1695RM-A                | 2   | Ø1", N-BK7 Mounted Plano-Convex Round Cyl Lens                                           |
| Thorlabs                      | CRM1L                     | 2   | Cage Rotation Mount for Ø1" Optics, Double Bored with Setscrew, 8-32 Tap                 |
| Thorlabs                      | CP20S                     | 2   | 30 mm Cage System Iris, Ø20.0 mm Maximum Aperture                                        |
| Thorlabs                      | CP90F                     | 2   | 30 mm Removable Cage Plate, Front and Back Plate, Internal SM1 Threading                 |
| Thorlabs                      | CXY1                      | 2   | 30 mm Cage System, XY Translating Lens Mount for Ø1" Optics                              |
| Thorlabs                      | CP12                      | 2   | 30 mm Cage Plate, Ø1.2" Double Bore for SM1 Lens Tube Mounting                           |
| Thorlabs                      | LCP01                     | 4   | 60 mm Cage Plate, SM2 Threads, 0.5" Thick, 8-32 Tap (Two SM2RR Retaining Rings Included) |

|                                                |                      |    |                                                                                                                                                       |
|------------------------------------------------|----------------------|----|-------------------------------------------------------------------------------------------------------------------------------------------------------|
| Thorlabs                                       | CLS-SL               | 2  | Scan Lens with Large Field of View, 400 to 750 nm, EFL=70 mm                                                                                          |
| Thorlabs                                       | ER18                 | 6  | Cage Assembly Rod, 18" Long, Ø6 mm                                                                                                                    |
| Thorlabs                                       | LCP50S               | 2  | 60 mm Cage System Iris, Ø50.0 mm Maximum Aperture                                                                                                     |
| Optotune                                       | EL-16-40-TC-VIS-5D-C | 2  | Electrically Tunable Lens                                                                                                                             |
| Thorlabs                                       | ER4                  | 18 | Cage Assembly Rod, 4" Long, Ø6 mm                                                                                                                     |
| Thorlabs                                       | VA100C               | 2  | 30mm Cage System Adjustable Slit, 8-32 Tap, Imperial Micrometer                                                                                       |
| Thorlabs                                       | GVS001               | 2  | 1D Galvo System, Silver-Coated Mirror, PSU Not Included                                                                                               |
| Thorlabs                                       | GCM001               | 2  | 1D Galvo 30 mm Cage System Mount                                                                                                                      |
| Omicron                                        | Custom               | 2  | Collimator with ~10 mm bead diameter output                                                                                                           |
| Omicron                                        | SOLE-6               | 1  | LASER engine with 4 lines: 405, 488, 561, 647 nm                                                                                                      |
| <b>Mounting Base</b>                           |                      |    |                                                                                                                                                       |
| Thorlabs                                       | MB1236               | 1  | Aluminum Breadboard 12" x 36" x 1/2", 1/4"-20 Taps                                                                                                    |
| Thorlabs                                       | RS12                 | 4  | Ø1" Pillar Post, 1/4"-20 Taps, L = 12", 8-32 Adapter Included                                                                                         |
| Thorlabs                                       | C1001                | 4  | Post Mounting Clamp for Ø1" Post                                                                                                                      |
| <b>Motorized XYZ Stage and sample mounting</b> |                      |    |                                                                                                                                                       |
| Thorlabs                                       | LNR50S               | 3  | 50 mm (1.97") TravelMax Translation Stage, 1/4"-20 Taps                                                                                               |
| Thorlabs                                       | LNR50P3              | 1  | XY Adapter Plate for LNR50 TravelMax Stages, Imperial Hole Spacings                                                                                   |
|                                                | LNR50P2              | 2  | Right-Angle Bracket for LNR50 TravelMax Stages, Imperial Threads                                                                                      |
| Custom                                         | Sample chamber       | 1  | Custom made 3D printed sample chamber                                                                                                                 |
| <b>Controls &amp; electronics</b>              |                      |    |                                                                                                                                                       |
| National Instruments                           | PXIe-PCle8381        | 1  | Control PCIe card for PXI chassis                                                                                                                     |
| National Instruments                           | NI PXIe-1028         | 1  | PXI express chassis                                                                                                                                   |
| National Instruments                           | 7852R                | 1  | FPGA card                                                                                                                                             |
| National Instruments                           | 7842R                | 2  | FPGA card                                                                                                                                             |
| Thorlabs                                       | GPS011               | 1  | Galvo System Linear Power Supply                                                                                                                      |
| Thorlabs                                       | LEDD1B               | 2  | T-Cube LED Driver with Trigger Mode, 1200 mA                                                                                                          |
| Thorlabs                                       | BSC203               | 1  | BSC203 - Three-Channel APT™ Benchtop Stepper Motor Controller                                                                                         |
| Markettech                                     | SOLE-6               | 1  | 6 Laser Light Engine with 4 wavelengths                                                                                                               |
| Serversdirect                                  | Custom               | 1  | Custom workstation with Supermicro X10DRHCT Motherboard, 24 TB SSD Hard Disks (EVO 850), 256 GB RAM (Crucial RDIMM DDR4), Quadro K4200 Graphics card. |
